# Supplementary material
Source: MDPI journal article supplement (https://www.mdpi.com/2073-4360/11/10/1585)

# checkCIF/PLATON report

Structure factors have been supplied for datablock(s) test

THIS REPORT IS FOR GUIDANCE ONLY. IF USED AS PART OF A REVIEW PROCEDURE FOR PUBLICATION, IT SHOULD NOT REPLACE THE EXPERTISE OF AN EXPERIENCED CRYSTALLOGRAPHIC REFEREE.

No syntax errors found.      CIF dictionary      Interpreting this report

## Datablock: test

---

Bond precision:    C-C = 0.0246 Å                      Wavelength=0.71073

Cell:                      a=8.886(3)              b=19.845(6)              c=19.662(5)  
                            alpha=90              beta=99.847(6)              gamma=90  
Temperature:              293 K

|                | Calculated          | Reported            |
|----------------|---------------------|---------------------|
| Volume         | 3416.2(18)          | 3416.0(17)          |
| Space group    | P 21/n              | P 21/n              |
| Hall group     | -P 2yn              | -P 2yn              |
| Moiety formula | C33 H29 Fe Mn N9 O3 | ?                   |
| Sum formula    | C33 H29 Fe Mn N9 O3 | C33 H29 Fe Mn N9 O3 |
| Mr             | 710.44              | 710.44              |
| Dx,g cm-3      | 1.381               | 1.381               |
| Z              | 4                   | 4                   |
| Mu (mm-1)      | 0.841               | 0.841               |
| F000           | 1460.0              | 1460.0              |
| F000'          | 1463.15             |                     |
| h,k,lmax       | 9,22,21             | 9,22,21             |
| Nref           | 4950                | 4907                |
| Tmin,Tmax      | 0.896,0.935         | 0.898,0.936         |
| Tmin'          | 0.896               |                     |

Correction method= # Reported T Limits: Tmin=0.898 Tmax=0.936  
AbsCorr = MULTI-SCAN

Data completeness= 0.991                      Theta(max)= 23.331

R(reflections)= 0.0960( 3285)              wR2(reflections)= 0.2797( 4907)

S = 1.015                      Npar= 428

---

The following ALERTS were generated. Each ALERT has the format

**test-name\_ALERT\_alert-type\_alert-level.**

Click on the hyperlinks for more details of the test.

---

**Alert level B**

THETM01\_ALERT\_3\_B The value of  $\sin(\theta_{\max})/\lambda$  is less than 0.575  
Calculated  $\sin(\theta_{\max})/\lambda = 0.5572$

**Author Response: The crystal is very small and fragile, making the diffraction very weak, especially in high angle range.**

PLAT341\_ALERT\_3\_B Low Bond Precision on C-C Bonds ..... 0.02462 Ang.  
PLAT601\_ALERT\_2\_B Structure Contains Solvent Accessible VOIDS of . 149 Ang\*\*3

---

**Alert level C**

PLAT084\_ALERT\_3\_C High wR2 Value (i.e. > 0.25) ..... 0.28 Report  
PLAT220\_ALERT\_2\_C Non-Solvent Resd 1 C Ueq(max)/Ueq(min) Range 3.1 Ratio  
PLAT232\_ALERT\_2\_C Hirshfeld Test Diff (M-X) Fe1 --N6 . 5.4 s.u.  
PLAT234\_ALERT\_4\_C Large Hirshfeld Difference Fe1 --N4 . 0.16 Ang.  
PLAT234\_ALERT\_4\_C Large Hirshfeld Difference O2 --C29 . 0.18 Ang.  
PLAT234\_ALERT\_4\_C Large Hirshfeld Difference N7 --C16 . 0.22 Ang.  
PLAT234\_ALERT\_4\_C Large Hirshfeld Difference N8 --C31 . 0.16 Ang.  
PLAT234\_ALERT\_4\_C Large Hirshfeld Difference C10 --C11 . 0.18 Ang.  
PLAT241\_ALERT\_2\_C High 'MainMol' Ueq as Compared to Neighbors of N7 Check  
PLAT241\_ALERT\_2\_C High 'MainMol' Ueq as Compared to Neighbors of C5 Check  
PLAT241\_ALERT\_2\_C High 'MainMol' Ueq as Compared to Neighbors of C17 Check  
PLAT241\_ALERT\_2\_C High 'MainMol' Ueq as Compared to Neighbors of C22 Check  
PLAT241\_ALERT\_2\_C High 'MainMol' Ueq as Compared to Neighbors of C25 Check  
PLAT241\_ALERT\_2\_C High 'MainMol' Ueq as Compared to Neighbors of C30 Check  
PLAT242\_ALERT\_2\_C Low 'MainMol' Ueq as Compared to Neighbors of N8 Check  
PLAT242\_ALERT\_2\_C Low 'MainMol' Ueq as Compared to Neighbors of C7 Check  
PLAT242\_ALERT\_2\_C Low 'MainMol' Ueq as Compared to Neighbors of C16 Check  
PLAT242\_ALERT\_2\_C Low 'MainMol' Ueq as Compared to Neighbors of C24 Check  
PLAT242\_ALERT\_2\_C Low 'MainMol' Ueq as Compared to Neighbors of C26 Check  
PLAT242\_ALERT\_2\_C Low 'MainMol' Ueq as Compared to Neighbors of C31 Check  
PLAT411\_ALERT\_2\_C Short Inter H...H Contact H17 ..H17 . 2.13 Ang.  
2-x,1-y,2-z = 3\_767 Check  
PLAT911\_ALERT\_3\_C Missing FCF Refl Between Thmin & STh/L= 0.557 43 Report  
PLAT978\_ALERT\_2\_C Number C-C Bonds with Positive Residual Density. 0 Info

---

**Alert level G**

PLAT003\_ALERT\_2\_G Number of Uiso or Uij Restrained non-H Atoms ... 20 Report  
PLAT004\_ALERT\_5\_G Polymeric Structure Found with Maximum Dimension 1 Info  
PLAT066\_ALERT\_1\_G Predicted and Reported Tmin&Tmax Range Identical ? Check  
PLAT072\_ALERT\_2\_G SHELXL First Parameter in WGHT Unusually Large 0.12 Report  
PLAT083\_ALERT\_2\_G SHELXL Second Parameter in WGHT Unusually Large 12.17 Why ?  
PLAT177\_ALERT\_4\_G The CIF-Embedded .res File Contains DELU Records 2 Report  
PLAT178\_ALERT\_4\_G The CIF-Embedded .res File Contains SIMU Records 1 Report  
PLAT186\_ALERT\_4\_G The CIF-Embedded .res File Contains ISOR Records 1 Report  
PLAT199\_ALERT\_1\_G Reported \_cell\_measurement\_temperature ..... (K) 293 Check  
PLAT200\_ALERT\_1\_G Reported \_diffrn\_ambient\_temperature ..... (K) 293 Check  
PLAT335\_ALERT\_2\_G Check Large C6 Ring C-C Range C7 -C12 0.21 Ang.  
PLAT335\_ALERT\_2\_G Check Large C6 Ring C-C Range C15 -C20 0.23 Ang.  
PLAT794\_ALERT\_5\_G Tentative Bond Valency for Fe1 (III) . 3.31 Info  
PLAT794\_ALERT\_5\_G Tentative Bond Valency for Mn1 (I) . 0.83 Info  
PLAT860\_ALERT\_3\_G Number of Least-Squares Restraints ..... 57 Note

|                   |                                                  |             |
|-------------------|--------------------------------------------------|-------------|
| PLAT883_ALERT_1_G | No Info/Value for _atom_sites_solution_primary . | Please Do ! |
| PLAT910_ALERT_3_G | Missing # of FCF Reflection(s) Below Theta(Min). | 1 Note      |
| PLAT933_ALERT_2_G | Number of OMIT Records in Embedded .res File ... | 23 Note     |

---

|    |                      |                                                              |
|----|----------------------|--------------------------------------------------------------|
| 0  | <b>ALERT level A</b> | = Most likely a serious problem - resolve or explain         |
| 3  | <b>ALERT level B</b> | = A potentially serious problem, consider carefully          |
| 23 | <b>ALERT level C</b> | = Check. Ensure it is not caused by an omission or oversight |
| 18 | <b>ALERT level G</b> | = General information/check it is not something unexpected   |

  

|    |                     |                                                              |
|----|---------------------|--------------------------------------------------------------|
| 4  | <b>ALERT type 1</b> | CIF construction/syntax error, inconsistent or missing data  |
| 23 | <b>ALERT type 2</b> | Indicator that the structure model may be wrong or deficient |
| 6  | <b>ALERT type 3</b> | Indicator that the structure quality may be low              |
| 8  | <b>ALERT type 4</b> | Improvement, methodology, query or suggestion                |
| 3  | <b>ALERT type 5</b> | Informative message, check                                   |

---

It is advisable to attempt to resolve as many as possible of the alerts in all categories. Often the minor alerts point to easily fixed oversights, errors and omissions in your CIF or refinement strategy, so attention to these fine details can be worthwhile. In order to resolve some of the more serious problems it may be necessary to carry out additional measurements or structure refinements. However, the purpose of your study may justify the reported deviations and the more serious of these should normally be commented upon in the discussion or experimental section of a paper or in the "special\_details" fields of the CIF. checkCIF was carefully designed to identify outliers and unusual parameters, but every test has its limitations and alerts that are not important in a particular case may appear. Conversely, the absence of alerts does not guarantee there are no aspects of the results needing attention. It is up to the individual to critically assess their own results and, if necessary, seek expert advice.

### Publication of your CIF in IUCr journals

A basic structural check has been run on your CIF. These basic checks will be run on all CIFs submitted for publication in IUCr journals (*Acta Crystallographica*, *Journal of Applied Crystallography*, *Journal of Synchrotron Radiation*); however, if you intend to submit to *Acta Crystallographica Section C* or *E* or *IUCrData*, you should make sure that full publication checks are run on the final version of your CIF prior to submission.

### Publication of your CIF in other journals

Please refer to the *Notes for Authors* of the relevant journal for any special instructions relating to CIF submission.

---

**PLATON version of 03/05/2019; check.def file version of 29/04/2019**

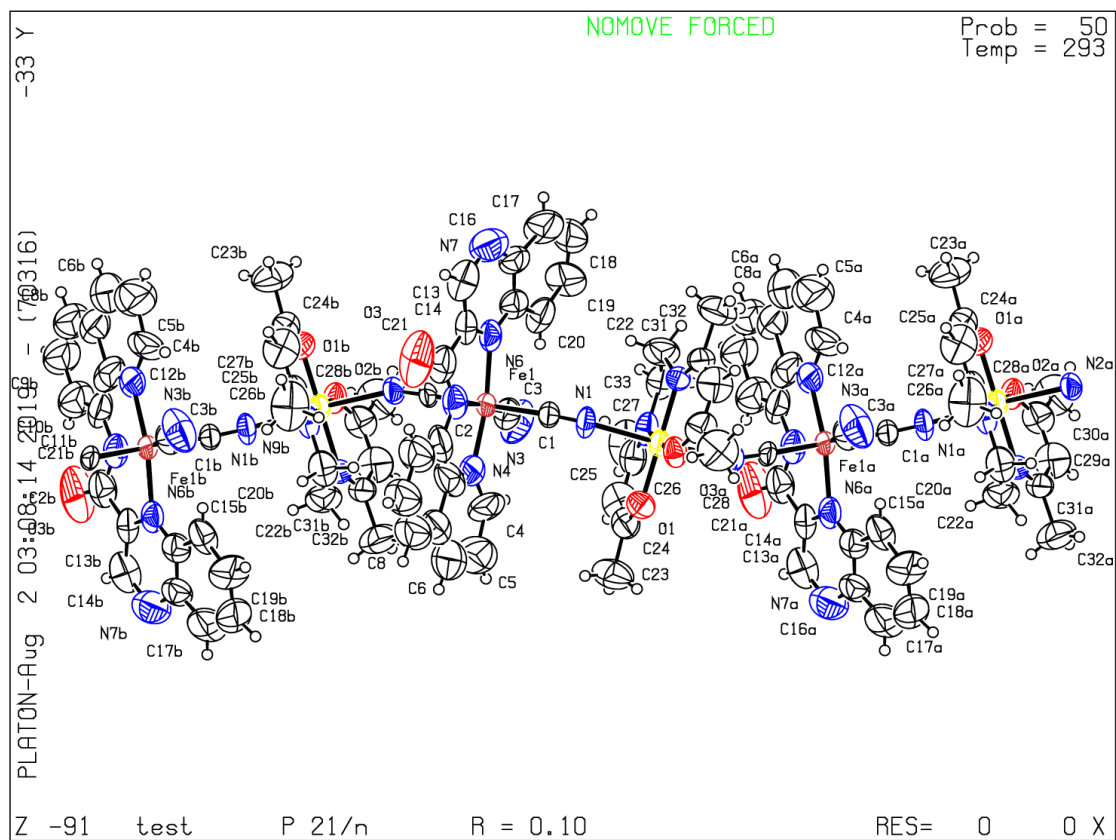

Supplement: s1 [file s1]
