# Supplementary material for: Various Structural Types of Cyanide-Bridged FeIII–MnIII Bimetallic Coordination Polymers (CPs) and Polynuclear Clusters Based-on A New mer-Tricyanoiron(III)Building Block: Synthesis, Crystal Structures, and Magnetic Properties
Source: MDPI journal article supplement (doi:10.3390/polym11101585), 2019-09-27

# checkCIF/PLATON report

Structure factors have been supplied for datablock(s) 2

THIS REPORT IS FOR GUIDANCE ONLY. IF USED AS PART OF A REVIEW PROCEDURE FOR PUBLICATION, IT SHOULD NOT REPLACE THE EXPERTISE OF AN EXPERIENCED CRYSTALLOGRAPHIC REFEREE.

No syntax errors found.      CIF dictionary      Interpreting this report

## Datablock: 2

---

Bond precision:    C-C = 0.0091 Å

Wavelength=0.71073

Cell:                    a=11.681(3)                    b=14.778(4)                    c=21.408(6)  
                          alpha=94.864(5)        beta=101.844(5)        gamma=90.613(5)  
Temperature:    293 K

|                        | Calculated                                                                     | Reported                                                      |
|------------------------|--------------------------------------------------------------------------------|---------------------------------------------------------------|
| Volume                 | 3602.3(17)                                                                     | 3602.3(16)                                                    |
| Space group            | P -1                                                                           | P -1                                                          |
| Hall group             | -P 1                                                                           | -P 1                                                          |
| Moiety formula         | 2(C39 H29 Br2 Fe Mn N9 O6),<br>2(C19 H22 Br2 Mn N2 O6), 2(Cl O4),<br>C119 H116 | C39H29Br2FeMnN9O6, C19H22Br2MnN2O6, ClO4, 1.5(Ch4O)<br>0.5H2O |
| Sum formula            | Br8 Cl2 Fe2C59.50 H58 Br4 Cl Fe Mn2 N11 O18<br>Mn4 N22 O36                     |                                                               |
| Mr                     | 3471.90                                                                        | 1735.99                                                       |
| Dx, g cm <sup>-3</sup> | 1.600                                                                          | 1.600                                                         |
| Z                      | 1                                                                              | 2                                                             |
| Mu (mm <sup>-1</sup> ) | 2.872                                                                          | 2.872                                                         |
| F000                   | 1738.0                                                                         | 1738.0                                                        |
| F000'                  | 1738.76                                                                        |                                                               |
| h,k,lmax               | 13,17,25                                                                       | 13,17,25                                                      |
| Nref                   | 12710                                                                          | 12538                                                         |
| Tmin,Tmax              | 0.427,0.517                                                                    | 0.471,0.558                                                   |
| Tmin'                  | 0.395                                                                          |                                                               |

Correction method= # Reported T Limits: Tmin=0.471 Tmax=0.558  
AbsCorr = MULTI-SCAN

Data completeness= 0.986

Theta(max)= 25.009

R(reflections)= 0.0514( 7569)

wR2(reflections)= 0.1595( 12538)

S = 1.008

Npar= 890

---

The following ALERTS were generated. Each ALERT has the format

**test-name\_ALERT\_alert-type\_alert-level.**

Click on the hyperlinks for more details of the test.

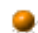

#### Alert level B

PLAT417\_ALERT\_2\_B Short Inter D-H...H-D H12A ..H19B . 2.06 Ang.  
-1+x,y,z = 1\_455 Check

**Author Response: This is maybe because of the intermolecular O-H...O and O-H...N hydrogen bond interactions.**

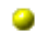

#### Alert level C

PLAT220\_ALERT\_2\_C Non-Solvent Resd 1 C Ueq(max)/Ueq(min) Range 3.4 Ratio  
PLAT230\_ALERT\_2\_C Hirshfeld Test Diff for N7 --C14 . 5.7 s.u.  
PLAT230\_ALERT\_2\_C Hirshfeld Test Diff for N7 --C16 . 5.5 s.u.  
PLAT230\_ALERT\_2\_C Hirshfeld Test Diff for C7 --C8 . 5.9 s.u.  
PLAT232\_ALERT\_2\_C Hirshfeld Test Diff (M-X) Mn1 --O6 . 6.5 s.u.  
PLAT234\_ALERT\_4\_C Large Hirshfeld Difference N5 --C21 . 0.17 Ang.  
PLAT234\_ALERT\_4\_C Large Hirshfeld Difference C15 --C16 . 0.17 Ang.  
PLAT241\_ALERT\_2\_C High 'MainMol' Ueq as Compared to Neighbors of N7 Check  
PLAT241\_ALERT\_2\_C High 'MainMol' Ueq as Compared to Neighbors of C18 Check  
PLAT241\_ALERT\_2\_C High 'MainMol' Ueq as Compared to Neighbors of C55 Check  
PLAT242\_ALERT\_2\_C Low 'MainMol' Ueq as Compared to Neighbors of O3 Check  
PLAT242\_ALERT\_2\_C Low 'MainMol' Ueq as Compared to Neighbors of C15 Check  
PLAT260\_ALERT\_2\_C Large Average Ueq of Residue Including C11 0.137 Check  
PLAT260\_ALERT\_2\_C Large Average Ueq of Residue Including O17 0.148 Check  
PLAT260\_ALERT\_2\_C Large Average Ueq of Residue Including O19 0.106 Check  
PLAT260\_ALERT\_2\_C Large Average Ueq of Residue Including O18 0.134 Check  
PLAT341\_ALERT\_3\_C Low Bond Precision on C-C Bonds ..... 0.00906 Ang.  
PLAT360\_ALERT\_2\_C Short C(sp3)-C(sp3) Bond C55 - C56 . 1.35 Ang.  
PLAT369\_ALERT\_2\_C Long C(sp2)-C(sp2) Bond C13 - C21 . 1.53 Ang.  
PLAT410\_ALERT\_2\_C Short Intra H...H Contact H55A ..H56B . 1.96 Ang.  
x,y,z = 1\_555 Check  
PLAT410\_ALERT\_2\_C Short Intra H...H Contact H55B ..H56A . 1.96 Ang.  
x,y,z = 1\_555 Check  
PLAT601\_ALERT\_2\_C Structure Contains Solvent Accessible VOIDS of . 39 Ang\*\*3  
PLAT905\_ALERT\_3\_C Negative K value in the Analysis of Variance ... -2.430 Report  
PLAT911\_ALERT\_3\_C Missing FCF Refl Between Thmin & STh/L= 0.595 169 Report  
PLAT934\_ALERT\_3\_C Number of (Iobs-Icalc)/SigmaW > 10 Outliers .... 1 Check  
PLAT975\_ALERT\_2\_C Check Calcd Resid. Dens. 0.59A From O17 0.41 eA-3  
PLAT978\_ALERT\_2\_C Number C-C Bonds with Positive Residual Density. 0 Info

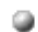

#### Alert level G

FORMU01\_ALERT\_1\_G There is a discrepancy between the atom counts in the  
\_chemical\_formula\_sum and \_chemical\_formula\_moiety. This is  
usually due to the moiety formula being in the wrong format.  
Atom count from \_chemical\_formula\_sum: C59.5 H58 Br4 Cl1 Fe1 Mn2 N11

Atom count from \_chemical\_formula\_moiety: C58.75 H54 Br4 Cl1 Fe1 Mn2 N1

|                   |                                                  |                    |              |
|-------------------|--------------------------------------------------|--------------------|--------------|
| PLAT002_ALERT_2_G | Number of Distance or Angle Restraints on AtSite | 4                  | Note         |
| PLAT003_ALERT_2_G | Number of Uiso or Uij Restrained non-H Atoms ... | 3                  | Report       |
| PLAT007_ALERT_5_G | Number of Unrefined Donor-H Atoms .....          | 9                  | Report       |
| PLAT042_ALERT_1_G | Calc. and Reported MoietyFormula Strings Differ  |                    | Please Check |
| PLAT045_ALERT_1_G | Calculated and Reported Z Differ by a Factor ... | 0.50               | Check        |
| PLAT154_ALERT_1_G | The s.u.'s on the Cell Angles are Equal ..(Note) | 0.005              | Degree       |
| PLAT172_ALERT_4_G | The CIF-Embedded .res File Contains DFIX Records | 2                  | Report       |
| PLAT178_ALERT_4_G | The CIF-Embedded .res File Contains SIMU Records | 1                  | Report       |
| PLAT199_ALERT_1_G | Reported _cell_measurement_temperature ..... (K) | 293                | Check        |
| PLAT200_ALERT_1_G | Reported _diffrn_ambient_temperature ..... (K)   | 293                | Check        |
| PLAT244_ALERT_4_G | Low 'Solvent' Ueq as Compared to Neighbors of    | Cl1                | Check        |
| PLAT300_ALERT_4_G | Atom Site Occupancy of O17                       | Constrained at 0.5 | Check        |
| PLAT300_ALERT_4_G | Atom Site Occupancy of C58                       | Constrained at 0.5 | Check        |
| PLAT300_ALERT_4_G | Atom Site Occupancy of H17A                      | Constrained at 0.5 | Check        |
| PLAT300_ALERT_4_G | Atom Site Occupancy of H58A                      | Constrained at 0.5 | Check        |
| PLAT300_ALERT_4_G | Atom Site Occupancy of H58B                      | Constrained at 0.5 | Check        |
| PLAT300_ALERT_4_G | Atom Site Occupancy of H58C                      | Constrained at 0.5 | Check        |
| PLAT300_ALERT_4_G | Atom Site Occupancy of O18                       | Constrained at 0.5 | Check        |
| PLAT300_ALERT_4_G | Atom Site Occupancy of H18A                      | Constrained at 0.5 | Check        |
| PLAT300_ALERT_4_G | Atom Site Occupancy of H18B                      | Constrained at 0.5 | Check        |
| PLAT302_ALERT_4_G | Anion/Solvent/Minor-Residue Disorder (Resd 4 )   | 100%               | Note         |
| PLAT302_ALERT_4_G | Anion/Solvent/Minor-Residue Disorder (Resd 6 )   | 100%               | Note         |
| PLAT304_ALERT_4_G | Non-Integer Number of Atoms in ..... Resd 6      | 1.50               | Check        |
| PLAT432_ALERT_2_G | Short Inter X...Y Contact O15 ..C46              | 2.99               | Ang.         |
|                   | x,y,z =                                          | 1.555              | Check        |
| PLAT779_ALERT_4_G | Suspect or Irrelevant (Bond) Angle in CIF .... # | 70                 | Check        |
|                   | H17A -O17 -H17A 1.555 1.555 1.555                | 0.00               | Deg.         |
| PLAT779_ALERT_4_G | Suspect or Irrelevant (Bond) Angle in CIF .... # | 74                 | Check        |
|                   | H18B -O18 -H18B 1.555 1.555 1.555                | 0.00               | Deg.         |
| PLAT779_ALERT_4_G | Suspect or Irrelevant (Bond) Angle in CIF .... # | 75                 | Check        |
|                   | H18A -O18 -H18A 1.555 1.555 1.555                | 0.00               | Deg.         |
| PLAT794_ALERT_5_G | Tentative Bond Valency for Fe1 (III) .           | 3.42               | Info         |
| PLAT794_ALERT_5_G | Tentative Bond Valency for Mn1 (I) .             | 0.84               | Info         |
| PLAT794_ALERT_5_G | Tentative Bond Valency for Mn2 (I) .             | 0.86               | Info         |
| PLAT802_ALERT_4_G | CIF Input Record(s) with more than 80 Characters | 1                  | Info         |
| PLAT860_ALERT_3_G | Number of Least-Squares Restraints .....         | 20                 | Note         |
| PLAT883_ALERT_1_G | No Info/Value for _atom_sites_solution_primary . |                    | Please Do !  |
| PLAT910_ALERT_3_G | Missing # of FCF Reflection(s) Below Theta(Min). | 4                  | Note         |
| PLAT933_ALERT_2_G | Number of OMIT Records in Embedded .res File ... | 36                 | Note         |

---

0 **ALERT level A** = Most likely a serious problem - resolve or explain  
 1 **ALERT level B** = A potentially serious problem, consider carefully  
 27 **ALERT level C** = Check. Ensure it is not caused by an omission or oversight  
 36 **ALERT level G** = General information/check it is not something unexpected

7 **ALERT type 1** CIF construction/syntax error, inconsistent or missing data  
 26 **ALERT type 2** Indicator that the structure model may be wrong or deficient  
 6 **ALERT type 3** Indicator that the structure quality may be low  
 21 **ALERT type 4** Improvement, methodology, query or suggestion  
 4 **ALERT type 5** Informative message, check

---

It is advisable to attempt to resolve as many as possible of the alerts in all categories. Often the minor alerts point to easily fixed oversights, errors and omissions in your CIF or refinement strategy, so attention to these fine details can be worthwhile. In order to resolve some of the more serious problems it may be necessary to carry out additional measurements or structure refinements. However, the purpose of your study may justify the reported deviations and the more serious of these should normally be commented upon in the discussion or experimental section of a paper or in the "special\_details" fields of the CIF. checkCIF was carefully designed to identify outliers and unusual parameters, but every test has its limitations and alerts that are not important in a particular case may appear. Conversely, the absence of alerts does not guarantee there are no aspects of the results needing attention. It is up to the individual to critically assess their own results and, if necessary, seek expert advice.

### **Publication of your CIF in IUCr journals**

A basic structural check has been run on your CIF. These basic checks will be run on all CIFs submitted for publication in IUCr journals (*Acta Crystallographica*, *Journal of Applied Crystallography*, *Journal of Synchrotron Radiation*); however, if you intend to submit to *Acta Crystallographica Section C* or *E* or *IUCrData*, you should make sure that full publication checks are run on the final version of your CIF prior to submission.

### **Publication of your CIF in other journals**

Please refer to the *Notes for Authors* of the relevant journal for any special instructions relating to CIF submission.

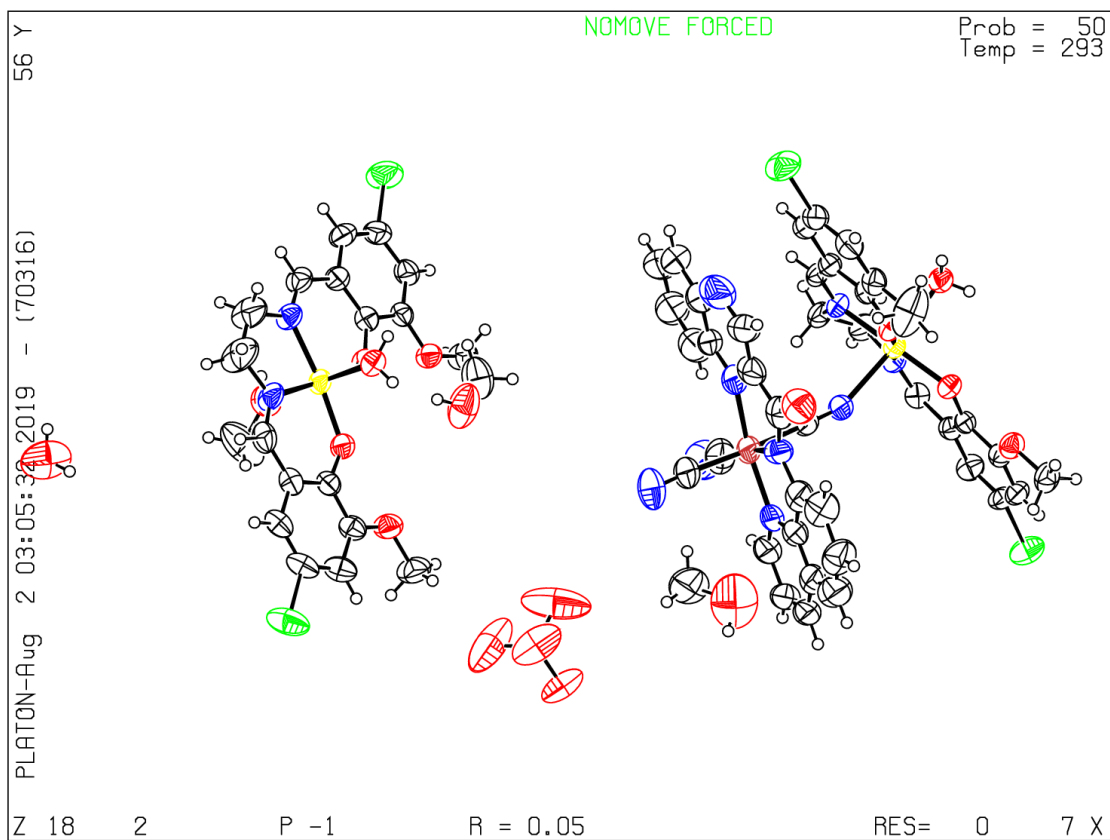

Supplement: s1 [file s1]
