# Supplementary material for: Various Structural Types of Cyanide-Bridged FeIII–MnIII Bimetallic Coordination Polymers (CPs) and Polynuclear Clusters Based-on A New mer-Tricyanoiron(III)Building Block: Synthesis, Crystal Structures, and Magnetic Properties
Source: MDPI journal article supplement (doi:10.3390/polym11101585), 2019-09-27

# checkCIF/PLATON report

Structure factors have been supplied for datablock(s) test

THIS REPORT IS FOR GUIDANCE ONLY. IF USED AS PART OF A REVIEW PROCEDURE FOR PUBLICATION, IT SHOULD NOT REPLACE THE EXPERTISE OF AN EXPERIENCED CRYSTALLOGRAPHIC REFEREE.

No syntax errors found.      CIF dictionary      Interpreting this report

## Datablock: test

---

|                        |                                                     |                                 |
|------------------------|-----------------------------------------------------|---------------------------------|
| Bond precision:        | C-C = 0.0101 Å                                      | Wavelength=0.71073              |
| Cell:                  | a=14.3852(11)      b=15.3085(11)      c=21.6557(17) |                                 |
|                        | alpha=90      beta=105.645(1)      gamma=90         |                                 |
| Temperature:           | 293 K                                               |                                 |
|                        | Calculated                                          | Reported                        |
| Volume                 | 4592.2(6)                                           | 4592.2(6)                       |
| Space group            | P 21/n                                              | P 21/n                          |
| Hall group             | -P 2yn                                              | -P 2yn                          |
|                        | C41 H33 Fe Mn N9 O3, C                              |                                 |
| Moiety formula         | H1.50 N0.50, C0.50 H2<br>O0.50, C H4 O, H0.         | ?                               |
| Sum formula            | C43.50 H41 Fe Mn N9.50<br>O4.75                     | C43.50 H41 Fe Mn N9.50<br>O4.75 |
| Mr                     | 883.65                                              | 883.65                          |
| Dx, g cm <sup>-3</sup> | 1.278                                               | 1.278                           |
| Z                      | 4                                                   | 4                               |
| Mu (mm <sup>-1</sup> ) | 0.643                                               | 0.643                           |
| F000                   | 1830.0                                              | 1830.0                          |
| F000'                  | 1833.32                                             |                                 |
| h,k,lmax               | 17,18,25                                            | 17,18,25                        |
| Nref                   | 8096                                                | 8062                            |
| Tmin,Tmax              | 0.837,0.891                                         | 0.825,0.894                     |
| Tmin'                  | 0.819                                               |                                 |

Correction method= # Reported T Limits: Tmin=0.825 Tmax=0.894  
AbsCorr = MULTI-SCAN

Data completeness= 0.996      Theta(max)= 25.009

R(reflections)= 0.0777( 6079)      wR2(reflections)= 0.2482( 8062)

S = 1.041      Npar= 577

---

The following ALERTS were generated. Each ALERT has the format

**test-name\_ALERT\_alert-type\_alert-level.**

Click on the hyperlinks for more details of the test.

---

### ● Alert level C

DIFMX02\_ALERT\_1\_C The maximum difference density is > 0.1\*ZMAX\*0.75

The relevant atom site should be identified.

|                   |                                                    |         |        |
|-------------------|----------------------------------------------------|---------|--------|
| PLAT094_ALERT_2_C | Ratio of Maximum / Minimum Residual Density ....   | 2.35    | Report |
| PLAT097_ALERT_2_C | Large Reported Max. (Positive) Residual Density    | 2.12    | eA-3   |
| PLAT220_ALERT_2_C | Non-Solvent Resd 1 C Ueq(max)/Ueq(min) Range       | 3.1     | Ratio  |
| PLAT234_ALERT_4_C | Large Hirshfeld Difference N7 --C11 .              | 0.17    | Ang.   |
| PLAT241_ALERT_2_C | High 'MainMol' Ueq as Compared to Neighbors of N7  |         | Check  |
| PLAT241_ALERT_2_C | High 'MainMol' Ueq as Compared to Neighbors of C29 |         | Check  |
| PLAT241_ALERT_2_C | High 'MainMol' Ueq as Compared to Neighbors of C34 |         | Check  |
| PLAT242_ALERT_2_C | Low 'MainMol' Ueq as Compared to Neighbors of C9   |         | Check  |
| PLAT242_ALERT_2_C | Low 'MainMol' Ueq as Compared to Neighbors of C11  |         | Check  |
| PLAT260_ALERT_2_C | Large Average Ueq of Residue Including N10         | 0.106   | Check  |
| PLAT260_ALERT_2_C | Large Average Ueq of Residue Including O6          | 0.121   | Check  |
| PLAT260_ALERT_2_C | Large Average Ueq of Residue Including O5          | 0.134   | Check  |
| PLAT341_ALERT_3_C | Low Bond Precision on C-C Bonds .....              | 0.01006 | Ang.   |
| PLAT911_ALERT_3_C | Missing FCF Refl Between Thmin & STh/L= 0.595      | 32      | Report |
| PLAT918_ALERT_3_C | Reflection(s) with I(obs) much Smaller I(calc) .   | 2       | Check  |
| PLAT934_ALERT_3_C | Number of (Iobs-Icalc)/SigmaW > 10 Outliers ....   | 1       | Check  |
| PLAT971_ALERT_2_C | Check Calcd Resid. Dens. 0.82A From Fe1            | 2.07    | eA-3   |
| PLAT975_ALERT_2_C | Check Calcd Resid. Dens. 0.94A From O5             | 1.23    | eA-3   |
| PLAT975_ALERT_2_C | Check Calcd Resid. Dens. 0.61A From O5             | 1.04    | eA-3   |
| PLAT975_ALERT_2_C | Check Calcd Resid. Dens. 0.67A From O5             | 1.04    | eA-3   |
| PLAT975_ALERT_2_C | Check Calcd Resid. Dens. 1.06A From O5             | 0.89    | eA-3   |
| PLAT975_ALERT_2_C | Check Calcd Resid. Dens. 1.05A From N7             | 0.51    | eA-3   |

---

### ● Alert level G

|                   |                                                  |      |        |
|-------------------|--------------------------------------------------|------|--------|
| PLAT003_ALERT_2_G | Number of Uiso or Uij Restrained non-H Atoms ... | 8    | Report |
| PLAT004_ALERT_5_G | Polymeric Structure Found with Maximum Dimension | 1    | Info   |
| PLAT007_ALERT_5_G | Number of Unrefined Donor-H Atoms .....          | 4    | Report |
| PLAT066_ALERT_1_G | Predicted and Reported Tmin&Tmax Range Identical | ?    | Check  |
| PLAT072_ALERT_2_G | SHELXL First Parameter in WGHT Unusually Large   | 0.14 | Report |
| PLAT083_ALERT_2_G | SHELXL Second Parameter in WGHT Unusually Large  | 9.83 | Why ?  |
| PLAT177_ALERT_4_G | The CIF-Embedded .res File Contains DELU Records | 1    | Report |
| PLAT186_ALERT_4_G | The CIF-Embedded .res File Contains ISOR Records | 1    | Report |
| PLAT199_ALERT_1_G | Reported _cell_measurement_temperature ..... (K) | 293  | Check  |
| PLAT200_ALERT_1_G | Reported _diffrn_ambient_temperature ..... (K)   | 293  | Check  |
| PLAT300_ALERT_4_G | Atom Site Occupancy of N10 Constrained at        | 0.5  | Check  |
| PLAT300_ALERT_4_G | Atom Site Occupancy of C45 Constrained at        | 0.5  | Check  |
| PLAT300_ALERT_4_G | Atom Site Occupancy of C46 Constrained at        | 0.5  | Check  |
| PLAT300_ALERT_4_G | Atom Site Occupancy of H47A Constrained at       | 0.5  | Check  |
| PLAT300_ALERT_4_G | Atom Site Occupancy of H47B Constrained at       | 0.5  | Check  |
| PLAT300_ALERT_4_G | Atom Site Occupancy of H47C Constrained at       | 0.5  | Check  |
| PLAT300_ALERT_4_G | Atom Site Occupancy of O4 Constrained at         | 0.5  | Check  |
| PLAT300_ALERT_4_G | Atom Site Occupancy of C43 Constrained at        | 0.5  | Check  |
| PLAT300_ALERT_4_G | Atom Site Occupancy of H4 Constrained at         | 0.5  | Check  |
| PLAT300_ALERT_4_G | Atom Site Occupancy of H43A Constrained at       | 0.5  | Check  |
| PLAT300_ALERT_4_G | Atom Site Occupancy of H43B Constrained at       | 0.5  | Check  |
| PLAT300_ALERT_4_G | Atom Site Occupancy of H43C Constrained at       | 0.5  | Check  |
| PLAT300_ALERT_4_G | Atom Site Occupancy of O5 Constrained at         | 0.25 | Check  |
| PLAT300_ALERT_4_G | Atom Site Occupancy of H5B Constrained at        | 0.25 | Check  |
| PLAT300_ALERT_4_G | Atom Site Occupancy of H5C Constrained at        | 0.25 | Check  |
| PLAT302_ALERT_4_G | Anion/Solvent/Minor-Residue Disorder (Resd 2 )   | 100% | Note   |
| PLAT302_ALERT_4_G | Anion/Solvent/Minor-Residue Disorder (Resd 3 )   | 100% | Note   |

|                   |                                                  |      |             |
|-------------------|--------------------------------------------------|------|-------------|
| PLAT302_ALERT_4_G | Anion/Solvent/Minor-Residue Disorder (Resd 5 )   | 100% | Note        |
| PLAT335_ALERT_2_G | Check Large C6 Ring C-C Range C4 -C9             | 0.17 | Ang.        |
| PLAT794_ALERT_5_G | Tentative Bond Valency for Fe1 (III)             | 3.31 | Info        |
| PLAT794_ALERT_5_G | Tentative Bond Valency for Mn1 (I)               | 0.82 | Info        |
| PLAT860_ALERT_3_G | Number of Least-Squares Restraints .....         | 21   | Note        |
| PLAT883_ALERT_1_G | No Info/Value for _atom_sites_solution_primary   |      | Please Do ! |
| PLAT909_ALERT_3_G | Percentage of I>2sig(I) Data at Theta(Max) Still | 49%  | Note        |
| PLAT910_ALERT_3_G | Missing # of FCF Reflection(s) Below Theta(Min). | 2    | Note        |
| PLAT913_ALERT_3_G | Missing # of Very Strong Reflections in FCF .... | 2    | Note        |
| PLAT933_ALERT_2_G | Number of OMIT Records in Embedded .res File ... | 30   | Note        |
| PLAT978_ALERT_2_G | Number C-C Bonds with Positive Residual Density. | 1    | Info        |

---

0 **ALERT level A** = Most likely a serious problem - resolve or explain  
0 **ALERT level B** = A potentially serious problem, consider carefully  
23 **ALERT level C** = Check. Ensure it is not caused by an omission or oversight  
38 **ALERT level G** = General information/check it is not something unexpected

5 **ALERT type 1** CIF construction/syntax error, inconsistent or missing data  
23 **ALERT type 2** Indicator that the structure model may be wrong or deficient  
8 **ALERT type 3** Indicator that the structure quality may be low  
21 **ALERT type 4** Improvement, methodology, query or suggestion  
4 **ALERT type 5** Informative message, check

---

It is advisable to attempt to resolve as many as possible of the alerts in all categories. Often the minor alerts point to easily fixed oversights, errors and omissions in your CIF or refinement strategy, so attention to these fine details can be worthwhile. In order to resolve some of the more serious problems it may be necessary to carry out additional measurements or structure refinements. However, the purpose of your study may justify the reported deviations and the more serious of these should normally be commented upon in the discussion or experimental section of a paper or in the "special\_details" fields of the CIF. checkCIF was carefully designed to identify outliers and unusual parameters, but every test has its limitations and alerts that are not important in a particular case may appear. Conversely, the absence of alerts does not guarantee there are no aspects of the results needing attention. It is up to the individual to critically assess their own results and, if necessary, seek expert advice.

### Publication of your CIF in IUCr journals

A basic structural check has been run on your CIF. These basic checks will be run on all CIFs submitted for publication in IUCr journals (*Acta Crystallographica*, *Journal of Applied Crystallography*, *Journal of Synchrotron Radiation*); however, if you intend to submit to *Acta Crystallographica Section C* or *E* or *IUCrData*, you should make sure that full publication checks are run on the final version of your CIF prior to submission.

### Publication of your CIF in other journals

Please refer to the *Notes for Authors* of the relevant journal for any special instructions relating to CIF submission.

---

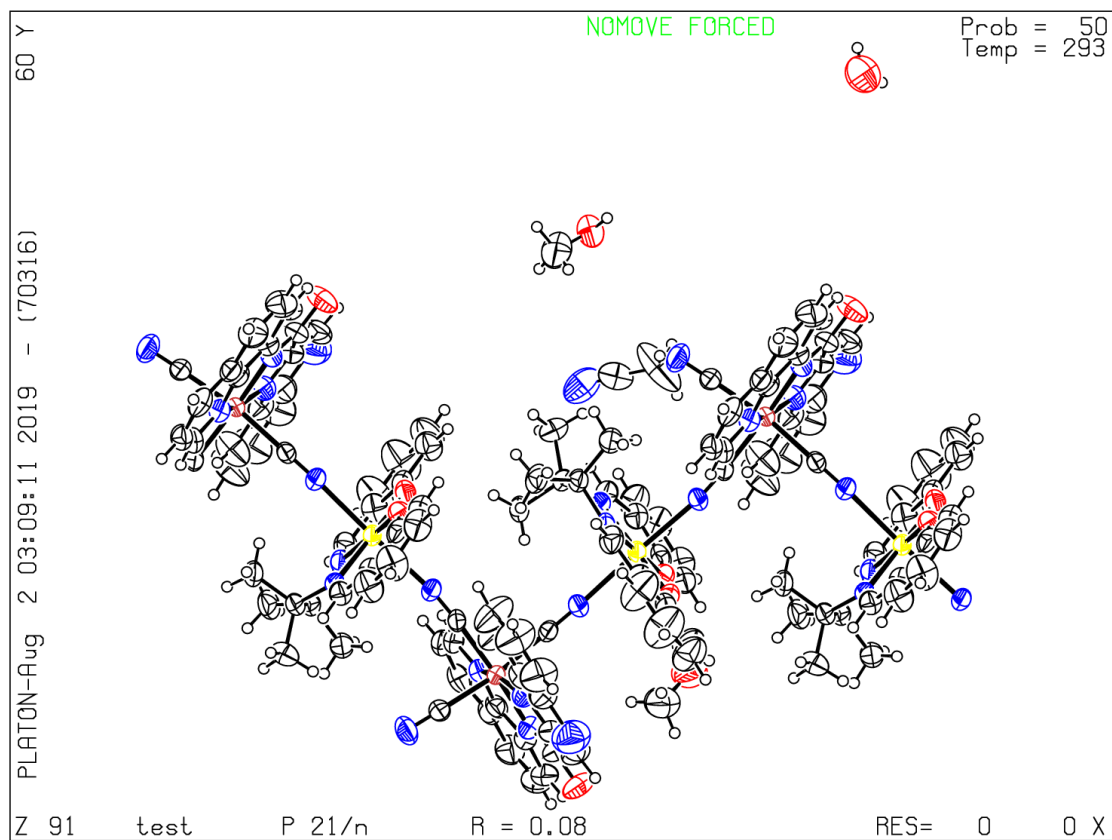

Supplement: s1 [file s1]
